# Supplementary material for: Physicochemical, Textural, and Sensorial Properties of Soy Yogurt as Affected by Addition of Low Acyl Gellan Gum
Source: MDPI journal article supplement (doi:10.3390/gels8070453), 2022-07-20
Supplement: s1 [file s1]

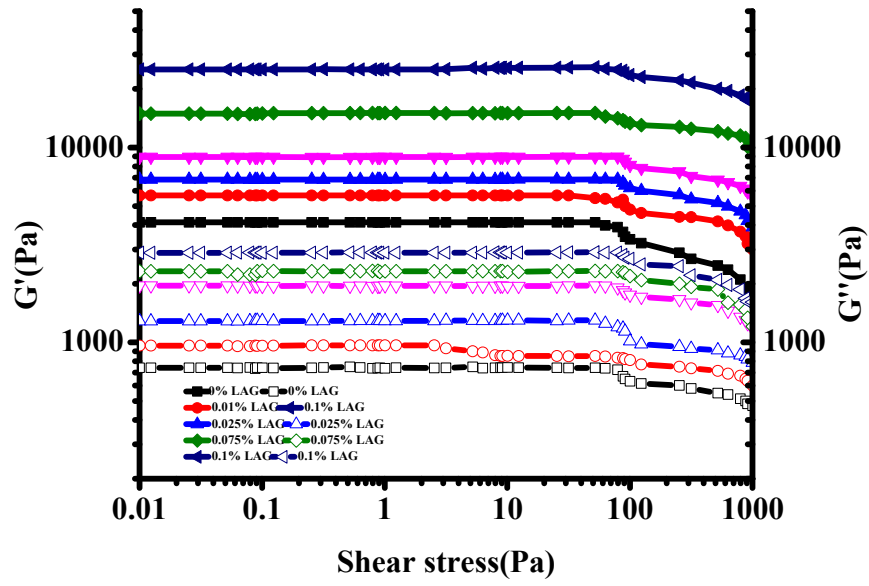

**Figure S1.** The stress curve of the soy yogurts supplemented with different concentrations of LAG (0%, 0.01%, 0.025%, 0.05%, 0.075%, and 0.1%).

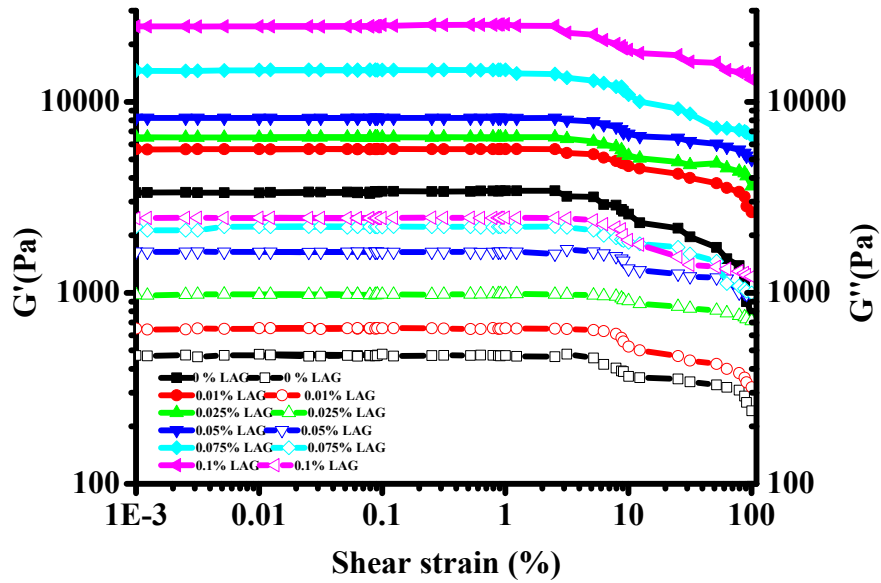

**Figure S2.** The strain sweep curve of the soy yogurts supplemented with different concentrations of LAG (0%, 0.01%, 0.025%, 0.05%, 0.075%, and 0.1%).
